# Supplementary material for: Identification of bifurcation transitions in biological regulatory networks using Answer-Set Programming
Source: Springer Nature journal article supplement (doi:10.1186/s13015-017-0110-3), 2017-07-20
Supplement: MOESM1 [file 13015_2017_110_MOESM1_ESM.pdf]

# Additional file 1 — Details on ASP implementation

Louis Fippo Fitime, Olivier Roux, Carito Guziolowski, and Loïc Paulevé

Supplementary material for the article

## A Over- and Under-approximation of Reachability

### A.1 $OA(s \rightarrow^* s')$ : necessary condition for reachability

We propose here a possible encoding of the necessary condition for reachability in ANs outlined in the article and introduced in [1]. Starting from  $s_u(g) = g_0$ , the analysis starts with the *local paths* of the objective  $g_0 \rightsquigarrow g_1$ :  $g_1$  is reachable only if all the conditions of the transitions of at least one local path  $\eta \in \text{local-paths}(g_0 \rightsquigarrow g_1)$  are reachable. This recursive reasoning can be modelled with a graph relating dependencies between objectives, local paths, and local states.

The local paths computed *a priori* are used to generate the template declaration of the directed edges of the LCG `oa_lcg(G,Parent,Child)` from each possible objective  $a_i \rightsquigarrow a_j$ . If  $\text{local-paths}(a_i \rightsquigarrow a_j) = \emptyset$ , the objective  $a_i \rightsquigarrow a_j$  is linked to a node `bottom`:

```
1 oa_lcg(G,obj(a,i,j),bottom) ← oa_lcg(G,_,obj(a,i,j)).
```

otherwise, for  $\text{local-paths}(a_i \rightsquigarrow a_j) = \{\eta^1, \dots, \eta^n\}$ , we declare a node `lpath` for each different local path  $m \in \{1, \dots, n\}$  as a child of  $a_i \rightsquigarrow a_j$ :

```
2 oa_lcg(G,obj(a,i,j),lpath(obj(a,i,j),m)) ← oa_lcg(G,_,obj(a,i,j)).
```

then, for each different local state  $b_k \in \widetilde{\eta^m}$  in the conditions of the local transitions of  $\eta^m$ , we add an edge from the `lpath` node to `ls(b,k)`:

```
3 oa_lcg(G,lpath(obj(a,i,j),m),ls(b,k)) ← oa_lcg(G,_,obj(a,i,j)).
```

In the case when the local path requires no condition ( $\widetilde{\eta^m} = \emptyset$ , this can happen when the objective is trivial, i.e.,  $a_i \rightsquigarrow a_i$ , or when the local transitions do not depend on the other automata), we link the `lpath` to a node `top`:

```
4 oa_lcg(G,lpath(obj(a,i,j),m),top) ← oa_lcg(G,_,obj(a,i,j)).
```

A LCG  $G$  for over-approximation is parameterized with a state  $s_G$ : if a local path has a local state  $a_j$  in its transition conditions, the node `ls(a,j)` is linked, in  $G$ , to the node for the objective  $a_i \rightsquigarrow a_j$  (line 5), with  $a_i = s_G(a)$ . It is therefore required that state  $s_G$  defines a (single) local state for each automaton referenced in  $G$  (line 6).

```
5 oa_lcg(G,ls(A,I),obj(A,J,I)) ← oa_lcg(G,_,ls(A,I)), s(G,A,J).
```

```
6 1 { s(G,A,J) : ls(A,J) } 1 ← oa_lcg(G,_,ls(A, _)).
```

The necessary condition for reachability is then declared using the predicate `oa_valid(G,N)` which is true if the node  $N$  satisfies the following condition: it is not `bottom` (line 7); and, in the case of a local state or objective node, one of its children is `oa_valid` (lines 8 and 9; or in the case of a local path, either `top` is its child, or all its children (local states) are `oa_valid` (lines 10 and 11).

```
7 ← oa_valid(G,bottom).
```

```
8 oa_valid(G,ls(A,I)) ← oa_lcg(G,ls(A,I),X), oa_valid(G,X).
```

```
9 oa_valid(G,obj(A,I,J)) ← oa_lcg(G,obj(A,I,J),X), oa_valid(G,X).
```

```
10 oa_valid(G,N) ← oa_lcg(G,N,top).
```

```
11 oa_valid(G,lpath(obj(a,i,j),m)) ←  $\bigwedge_{b_k \in \widetilde{\eta^m}}$  oa_valid(G,ls(b,k)).
```

## A.2 $UA(s \rightarrow^* s')$ : sufficient condition for reachability

We give here a declarative implementation of the sufficient condition for reachability in ANs outlined in the paper and introduced in [2]. The under-approximation consists in building a graph relating objectives, local paths, and local states which satisfies several constraints. If such a graph exists, then the related reachability property is true. Similarly to (I1#), we give template declarations for the edges with the predicate  $ua\_lcg(G, Parent, Child)$ . We assume that the reachability property is specified by adding an edge from  $root$  to  $ls(a, i)$  for each local state to reach.

The graph  $ua\_lcg$  is parameterized with a *context* which is a set of local states, declared with the predicate  $ctx(G, A, J)$ . Every local states  $a_i$  of the graph that are not part of the reachability specification belong to that context (line 12); and are linked to the objective  $a_j \rightsquigarrow a_i$  for each  $a_j$  in the context (line 13).

```
12 ctx(G, A, I) ← ua_lcg(G, N, ls(A, I)), N != root.
13 ua_lcg(G, ls(A, I), obj(A, J, I)) ← ua_lcg(G, _, ls(A, I)), ctx(G, A, J).
```

A first constraint is that each objective in the graph is linked to one and only one of its local path. Therefore, objectives without local paths ( $local\_paths(a_i \rightsquigarrow a_j) = \emptyset$ ) cannot be included (line 14), for the others, a choice has to be made among  $local\_paths(a_i \rightsquigarrow a_j) = \{\eta^1, \dots, \eta^m\}$  (line 15).

```
14 ← ua_lcg(G, _, obj(a, i, j)).
15 1 { ua_lcg(G, obj(a, i, j), lpath(obj(a, i, j), 1..n)) } 1 ← ua_lcg(G, _, obj(a, i, j)).
```

As for  $oa\_lcg$ , each local path is linked to all the local states composing its transition conditions: for each  $m \in \{1, \dots, n\}$ , for each  $b_k \in \widetilde{\eta}^m$ ,

```
16 ua_lcg(G, lpath(obj(a, i, j), m), ls(b, k)) ← ua_lcg(G, _, obj(a, i, j)).
```

The graph has to be acyclic. This is declared using a predicate  $conn(G, X, Y)$  which is true if the node  $X$  is connected (there is a directed path) to  $Y$  (line 17). A graph is cyclic when  $conn(G, X, X)$  (line 18).

```
17 conn(G, X, Y) ← ua_lcg(G, X, Y). conn(G, X, Y) ← ua_lcg(G, X, Z), conn(G, Z, Y).
18 ← conn(G, X, X).
```

Then, if the node for an objective  $a_i \rightsquigarrow a_j$  is connected to a local state  $a_k$ , the under-approximation requires  $a_i \rightsquigarrow a_j$  to be connected with  $a_k \rightsquigarrow a_j$  (assuming that  $a$  has at least 3 local states, definition not shown):

```
19 ua_lcg(G, obj(A, I, J), obj(A, K, J)) ← not boolean(A), conn(G, obj(A, I, J), ls(A, K)).
```

When a local transition is conditioned by at least two other automata (for instance  $c_o \xrightarrow{a_i, b_j} c_\bullet$ ), the under-approximation requests that reaching  $b_j$  does not involve other local states from  $a$  others that  $a_i$ . This is stated by the  $indep(G, Y, a, i, ls(b, j))$  which cannot be true if  $b_j$  is connected to a local state  $a_k$  with  $k \neq i$  line 20. Then, the under-approximation requires that at most one  $indep$  predicate is false, for a given LCG  $G$  and a given local path  $Y$  (line 21). Such an independence should also hold between the local states of the reachability specification (line 22).

```
20 indepfailure(Y, ls(A, I)) ← indep(G, Y, A, I, N), conn(G, N, ls(A, K)), K != I.
21 ← indepfailure(Y, N), indepfailure(Y, M), M != N.
22 indep(G, root, A, I, ls(B, J)) ← ua_lcg(G, root, ls(A, I)), ua_lcg(G, root, ls(B, J)), B != A.
```

For  $\eta^m \in local\_paths(a_i \rightsquigarrow a_j)$ , for each local transition  $a_o \xrightarrow{\ell} a_\bullet \in \eta^m$ , for each couple of different local states in its condition  $b_k, c_l \in \ell, b_k \neq c_l$ :

```
23 indep(G, lpath(obj(a, i, j), m), b, k, ls(c, l)) ← ua_lcg(G, _, lpath(obj(a, i, j), m)).
```

## B Reachability in unfoldings

A (prefix of an) unfolding is an acyclic bipartite digraph where nodes are either *events* (application of a transition) or *conditions* (change of local state) [3]. We use the predicate  $post(X, Y)$  to denote an edge from  $X$  to  $Y$ ; and  $h(C, ls(A, I))$  to denote that the condition  $C$  corresponds to the local state  $a_i$ . Figure 1 shows an example of unfolding.

A state  $s$  belongs to the prefix if it is possible to build a *configuration* such that all the local states in  $s$  have a unique corresponding condition on the *cut* of the configuration (line 1).

A configuration is a set of events, and we use  $e(E)$  to denote that the event  $E$  belongs to the configuration. By definition, if  $E$  is in a configuration, all its parent events are in the configuration (line 2). There should be no *conflicts* between two events of a configuration: two events are in conflict if they share a common parent condition (line 3).

A condition is on the cut if its parent event is in the configuration (line 4), and none of its children event is in the configuration (line 5).

```

1 1 { cut(C) : h(C,ls(A,I)) } 1 ← reach(A,I).
2 e(F) ← post(F,C),post(C,E),e(E).
3 ← post(C,E),post(C,F),e(E),e(F),E != F.
4 e(E) ← cut(C),post(E,C).
5 ← cut(C),post(C,E),e(E).

```

## References

- [1] Paulevé, L., Magnin, M., Roux, O.: Static analysis of biological regulatory networks dynamics using abstract interpretation. *Mathematical Structures in Computer Science* **22**(04), 651–685 (2012)
- [2] Folschette, M., Paulevé, L., Magnin, M., Roux, O.: Sufficient conditions for reachability in automata networks with priorities. *Theoretical Computer Science* **608 Part 1**, 66–83 (2015). From Computer Science to Biology and Back
- [3] Esparza, J., Heljanko, K.: *Unfoldings – A Partial-Order Approach to Model Checking*. Springer, Berlin, Heidelberg (2008)

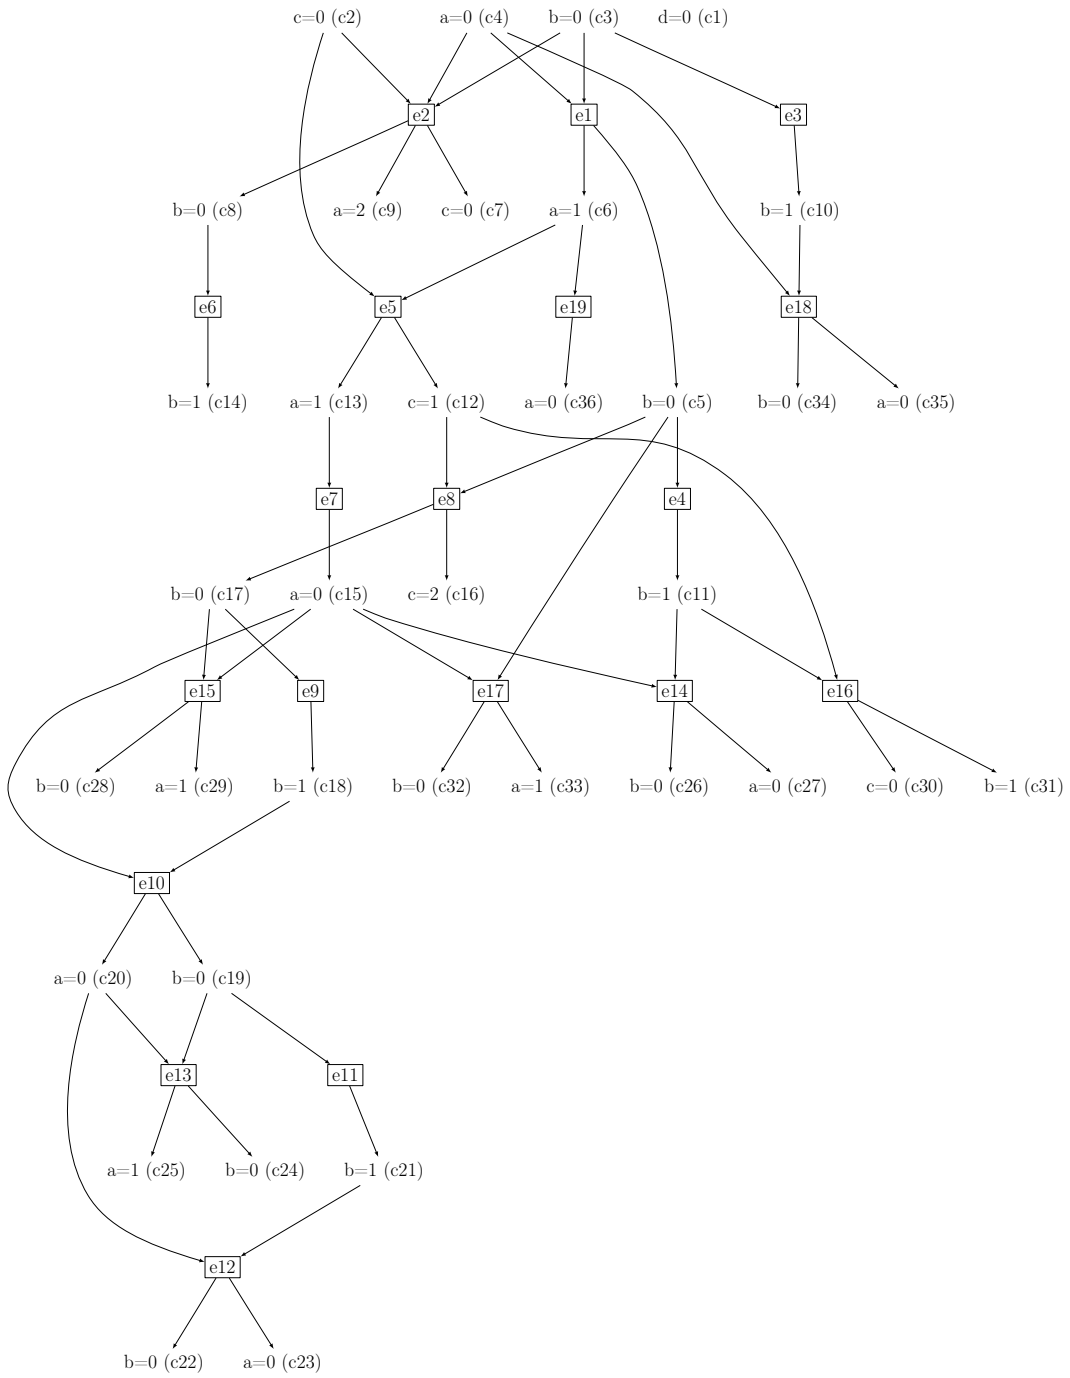

Figure 1: Unfolding of the AN of Figure 1 from the main article. Events are boxed nodes, conditions have no borders and indicate both the automata local state and the condition identifier.
